# Supplementary material for: Low temperature aqueous synthesis of size-controlled nanocrystals through size focusing: a quantum dot biomineralization case study
Source: Royal Society of Chemistry journal article supplement (doi:10.1039/c8nr06166a), 2018-01-01
Supplement: c8nr06166a1.pdf [file c8nr06166a1.pdf]

## Supplementary Information

### Low Temperature Aqueous Synthesis of Size-Controlled Nanocrystals Through Size Focusing: A Quantum Dot Biomineralization Case Study

Leah C. Spangler<sup>1</sup>, Joseph Cline<sup>2</sup>, Christopher J. Kiely<sup>1,2</sup>, Steven McIntosh\*<sup>1</sup>

<sup>1</sup> Department of Chemical and Biomolecular Engineering, Lehigh University, Bethlehem, PA 18015, USA.

<sup>2</sup> Department of Materials Science and Engineering, Lehigh University, Bethlehem, PA 18015, USA.

\*mcintosh@lehigh.edu

#### Table of Contents

**Table S1.** Estimated particle sizes, HWHM, FWHM, and particle size distributions from TEM analysis for the CdS populations shown in Figure 1.

**Figure S1.** A low magnification (left) and high magnification (right) STEM-HAADF image of CdS nanocrystals biomineralized by CSE at pH 7.5 with an absorbance peak at 350 nm.

**Table S2.** Compiled estimated particle sizes and HWHM values tabulated for the single-step addition synthesis method results shown in Figure 3.

**Table S3.** Estimated particle sizes, HWHM, FWHM, and particle size distributions from TEM analysis for the CdS populations shown in Figure 6.

**Table S4.** Estimated particle sizes and HWHM for the CdS populations shown in Figure 7.

**Table S5.** Estimated particle sizes, HWHM, and FWHM values for the CdS populations shown in Figure 8.

#### Calculation of $K_{obs}$

**Table S1.** Estimated particle sizes, HWHM, FWHM, and particle size distributions from TEM analysis for the CdS populations shown in Figure 1.

| Growth time (min) | Absorbance peak (nm) | Estimated Diameter (nm) | HWHM (nm)      | FWHM (nm)     | Diameter from TEM (nm) |
|-------------------|----------------------|-------------------------|----------------|---------------|------------------------|
| 30                | 310                  | 1.47                    | $18.5 \pm 2.8$ | -             | -                      |
| 60                | 330                  | 1.68                    | $25.5 \pm 2.8$ | $128 \pm 7.8$ | $2.06 \pm 0.52$        |
| 90                | 340                  | 1.85                    | $27.7 \pm 2.3$ | $127 \pm 4.2$ | -                      |
| 120               | 350                  | 2.07                    | $24.2 \pm 1.9$ | $128 \pm 2.1$ | $2.40 \pm 0.51$        |
| 150               | 370                  | 2.48                    | $23.3 \pm 2.0$ | $133 \pm 9.2$ | -                      |

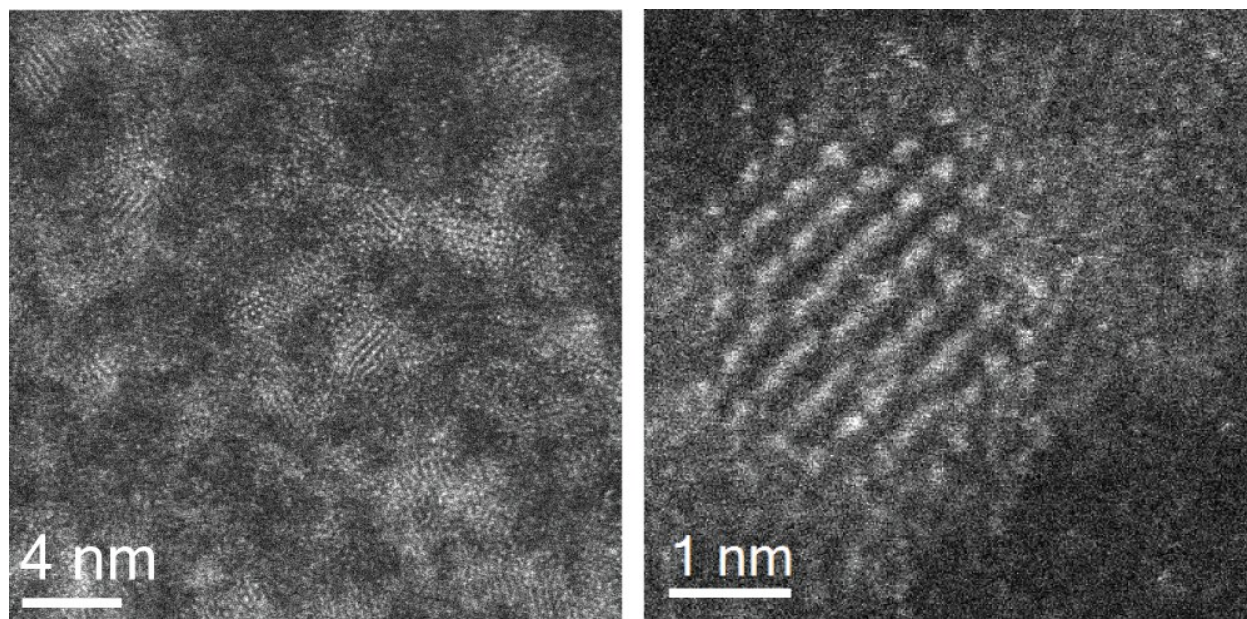

**Figure S1.** A low magnification (left) and high magnification (right) STEM-HAADF image of CdS nanocrystals biomineralized by CSE at pH 7.5 with an absorbance peak at 350 nm.

**Table S2.** Compiled estimated particle sizes and HWHM values tabulated for the single-step addition synthesis method results shown in Figure 3.

| Figure 3 a) Single-step addition, initial measurement |                      |                         |             |
|-------------------------------------------------------|----------------------|-------------------------|-------------|
| NaHS Concentration                                    | Absorbance Peak (nm) | Estimated Diameter (nm) | HWHM (nm)   |
| 100 mM                                                | 300                  | 1.39                    | 28.1 ± 1.8  |
| 200 mM                                                | 304                  | 1.42                    | 40 ± 2.56   |
| 300 mM                                                | 328                  | 1.69                    | 24.9 ± 2.26 |
| 400 mM                                                | 332                  | 1.75                    | 31 ± 1.1    |
| 500 mM                                                | 345                  | 1.98                    | 28.2 ± 1.45 |

| Figure 3 b) Single-step addition, 2 hours ripening at 37°C |                      |                         |             |
|------------------------------------------------------------|----------------------|-------------------------|-------------|
| NaHS Concentration                                         | Absorbance Peak (nm) | Estimated Diameter (nm) | HWHM (nm)   |
| 100 mM                                                     | 328                  | 1.68                    | 16.5 ± 1.5  |
| 200 mM                                                     | 328                  | 1.69                    | 30.4 ± 2.4  |
| 300 mM                                                     | 340                  | 1.88                    | 26.8 ± 4.25 |
| 400 mM                                                     | 352                  | 2.11                    | 23.5 ± 1.0  |
| 500 mM                                                     | 360                  | 2.29                    | 22.3 ± 1.5  |

**Table S3.** Estimated particle sizes, HWHM, FWHM, and particle size distributions from TEM analysis for the CdS populations shown in Figure 6.

| NaHS concentration | Absorbance Peak (nm) | Estimated Diameter (nm) | HWHM (nm)  | Size from TEM |
|--------------------|----------------------|-------------------------|------------|---------------|
| 100 mM             | 305                  | 1.43                    | 36.2 ± 1.6 | -             |
| 200 mM             | 313                  | 1.50                    | 27.5 ± 1.8 | -             |
| 300 mM             | 320                  | 1.58                    | 30.2 ± 2.8 | 2.06 ± 0.45   |
| 400 mM             | 331                  | 1.74                    | 31.2 ± 2.8 | -             |
| 500 mM             | 355                  | 2.19                    | 23 ± 2.0   | 2.44 ± 0.46   |

**Table S4.** Estimated particle sizes and HWHM for the CdS populations shown in Figure 7.

| Cadmium:<br>Cysteine | Absorbance<br>peak (nm) | Estimated<br>Diameter (nm) | HWHM (nm)  |
|----------------------|-------------------------|----------------------------|------------|
| 1:8                  | 390                     | 3.08                       | 24.4 ± 4.7 |
| 2:8                  | 360                     | 2.29                       | 18.1 ± 0.8 |
| 4:8                  | 328                     | 1.70                       | 20.4 ± 3.0 |
| 2:16                 | 350                     | 2.28                       | 17.4 ± 3.0 |
| 4:32                 | 316                     | 1.54                       | 23.3 ± 4.5 |

**Table S5.** Estimated particle sizes, HWHM, and FWHM values for the CdS populations shown in Figure 8.

| Growth time<br>(min) | Absorbance<br>peak (nm) | Estimated<br>Diameter (nm) | HWHM (nm)  | FWHM (nm)  |
|----------------------|-------------------------|----------------------------|------------|------------|
| 30                   | 366                     | 2.42                       | 34.1 ± 1.3 | -          |
| 60                   | 367                     | 2.45                       | 23.6 ± 1.4 | 121 ± 10.7 |
| 90                   | 370                     | 2.52                       | 23.2 ± 1.1 | 128 ± 19.3 |
| 120                  | 371                     | 2.55                       | 22.4 ± 3.7 | 125 ± 18.2 |
| 180                  | 373                     | 2.60                       | 24.3 ± 3.5 | 125 ± 17.9 |
| 240                  | 377                     | 2.71                       | 23.8 ± 2.5 | 124 ± 13.3 |

## Calculation of $K_{obs}$

The  $K_{obs}$  value used in the calculation of  $S_{\infty}$  was obtained by deriving the observed solubility constant as demonstrated by Xie *et al.*

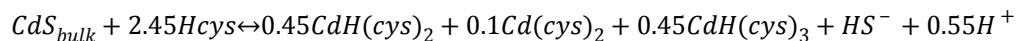

$H_{cys}$  represents a protonated L-cysteine. Each of the possible Cd-cysteine chelation species are shown in the above equation:  $CdH(cys)_2$ ,  $Cd(cys)_2$ , and  $CdH(cys)_3$ . These species and their relative ratios have been acquired from the supplemental information acquired by Jalilehvand *et al.* Given the reaction above,  $K_{obs}$  can be defined.

$$K_{obs} = \frac{[CdH(cys)_2]^{0.45}[Cd(cys)_2]^{0.1}[CdH(cys)_3]^{0.45}[HS^-][H^+]^{0.55}}{[Hcys]^{2.45}}$$

$K_{obs}$  can be rearranged in terms of the solubility constants for each species to yield the final relation

$$K_{obs} = \frac{\beta_{CdH(cys)_2}^{0.45}\beta_{Cd(cys)_2}^{0.1}\beta_{CdH(cys)_3}^{0.45}(K_a^{cys})^{2.45}K_{sp}^{CdS_{bulk}}}{K_d^{HS^-}}$$

Bulk solubility,  $S_{\infty}$ , can then be calculated using this new  $K_{obs}$  in terms of  $HS^-$ .

## References

- 1 F. Jalilehvand, B. O. Leung and V. Mah, *Inorg. Chem.*, 2009, **48**, 5758-5771.
- 2 R. Xie, Z. Li and X. Peng, *J. Am. Chem. Soc.*, 2009, **131**, 15457-15466.
